# Supplementary material for: Physicochemical and rheological properties of a novel monoolein-based vesicle gel
Source: Royal Society of Chemistry journal article supplement (doi:10.1039/c2sm27215f), 2012-11-19
Supplement: c2sm27215f.pdf [file c2sm27215f.pdf]

## Electronic Supplementary Information

### Physicochemical and rheological properties of a novel monoolein-based vesicle gel

Ruggero Angelico,<sup>a</sup> Maura Carboni,<sup>b</sup> Sandrina Lampis,<sup>b</sup> Judith Schmidt,<sup>c</sup> Yeshayahu Talmon,<sup>c</sup> Maura Monduzzi,<sup>b</sup> Sergio Murgia<sup>b,\*</sup>

<sup>a</sup> University of Molise (DIAAA) e CSGI, v. De Sanctis, I-86100 Campobasso (CB), Italy.

<sup>b</sup> Department of Chemical and Geological Science, University of Cagliari, CNBS e CSGI, s.s. 554 bivio Sestu, I-09042 Monserrato (CA), Italy; Tel: +390706754453; E-mail: murgias@unica.it

<sup>c</sup> Department of Chemical Engineering, Technion – Israel Institute of Technology, Haifa 3200, Israel.

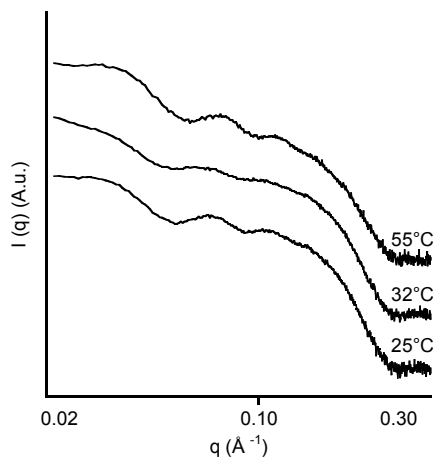

**Figure S1.** Log-Log plot of SAXS patterns reported as stack plot of the VLG sample with composition MO/LCh/W = 13.2/1.2/85.6 (wt%) collected at 25, 32, and 55 °C.

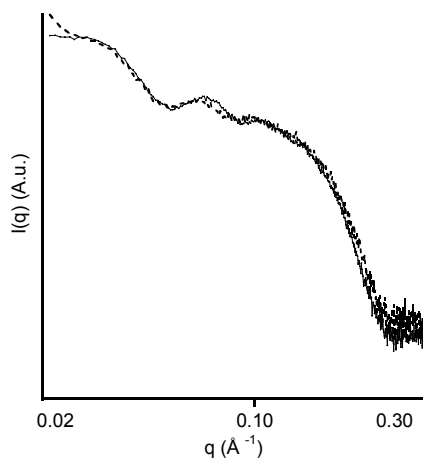

**Figure S2.** Log-Log plot of SAXS patterns collected at 25 °C of the VLG sample empty (solid line) and loaded with 1 mg/g of HDCF (dashed line).
